# Supplementary material
Source: Research Square preprint supplement (doi:10.21203/rs.3.rs-9010194/v1)
Supplement: Supplementary file 1 [file eea9c15507eaacf0bbe5758b.docx]

**APPENDIX I**

**Supplementary information to:**

**Assessment of Metabolites in Sera and Cerebrospinal Fluids of rabies-infected Dogs (Nigeria).**

3. Results and discussion

**3.2. GCxGC-TOFMS results**

| 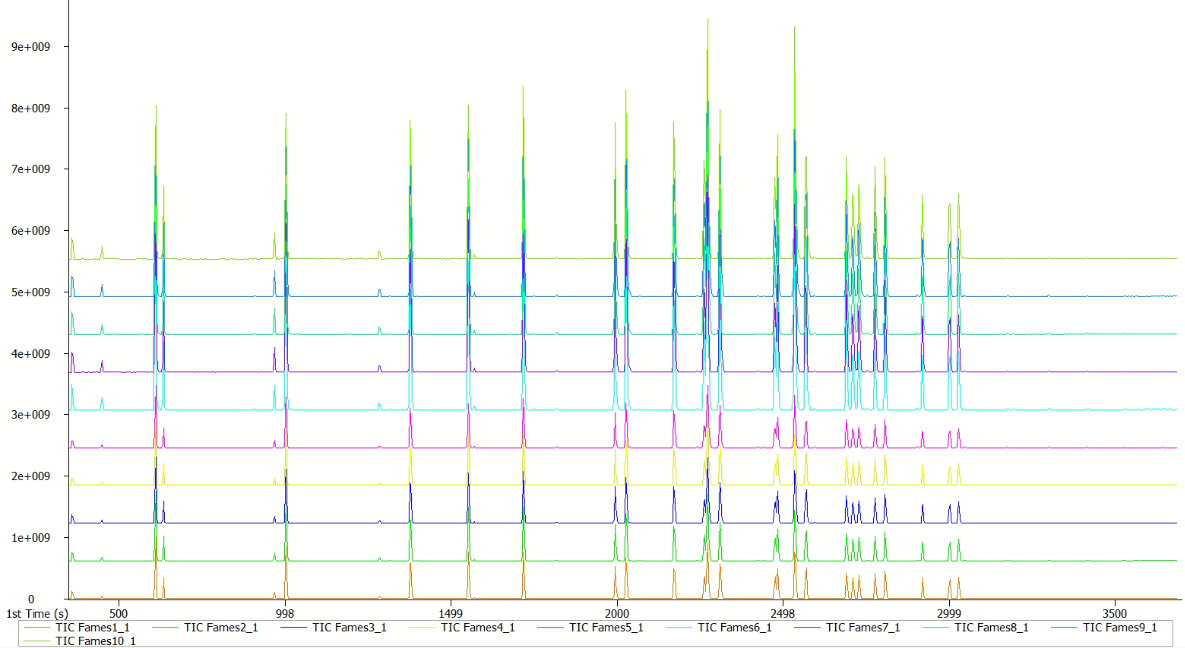 |
| --- |
| ***Figure S1: Chromatographic results of the FAMES standard within the analytical serum batches.*** |
|  |
| ***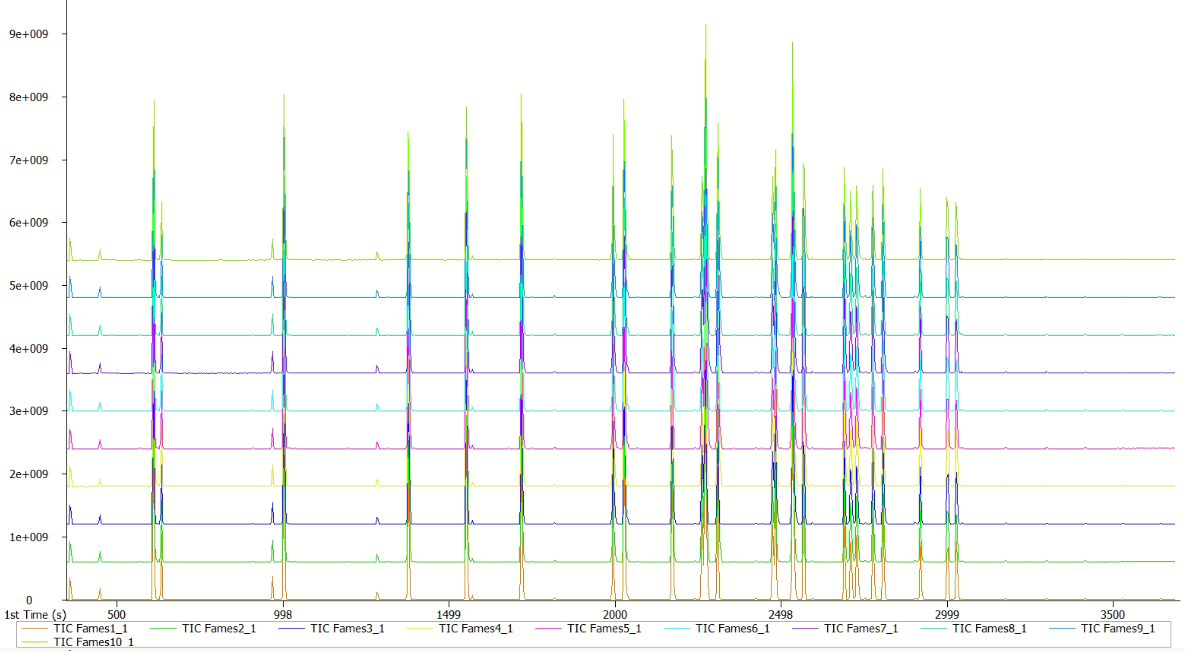*** |
| ***Figure S2: Chromatographic results of the FAMES standard within the analytical CSF batches.*** |

| **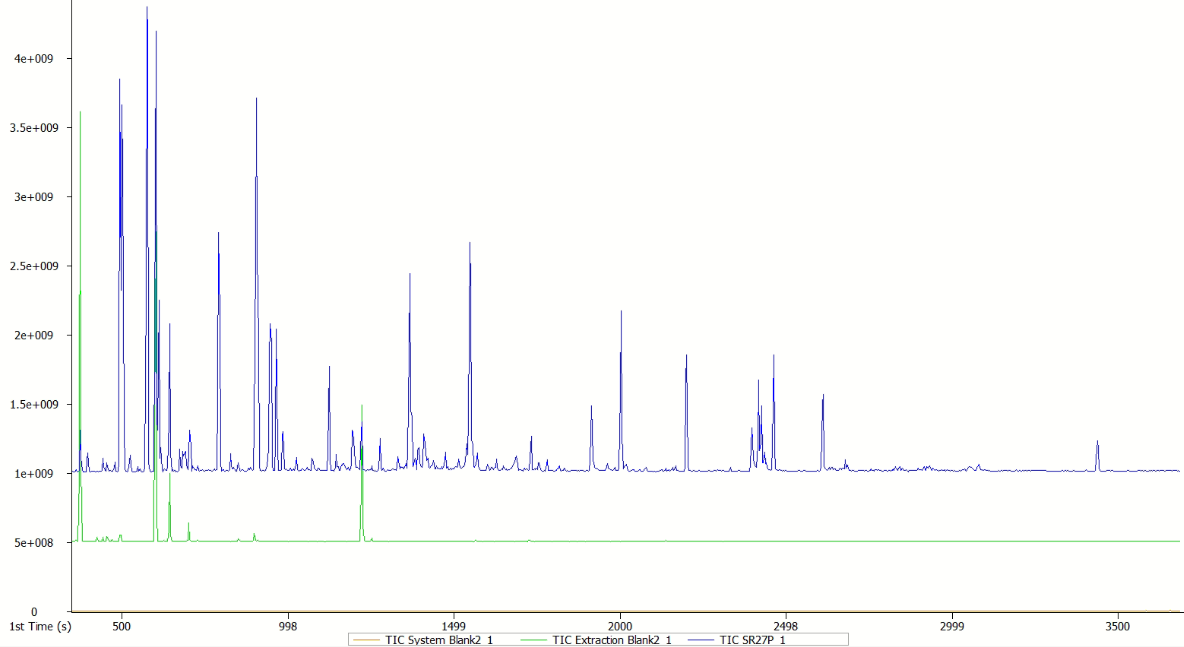** |
| --- |
| **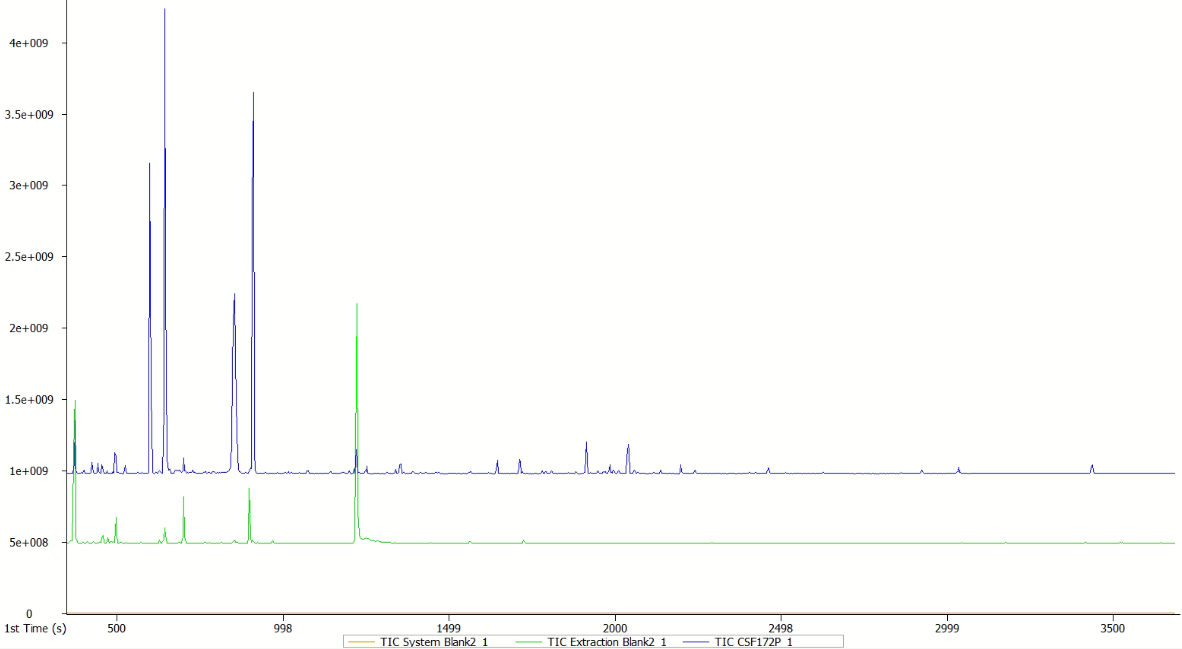** |
| ***Figure S3: Overlay of the system blank (orange), extraction blank (green) and analytical sample chromatograms for serum (blue, top) and CSF (blue, bottom) batches.*** |

**3.3 Data overview**


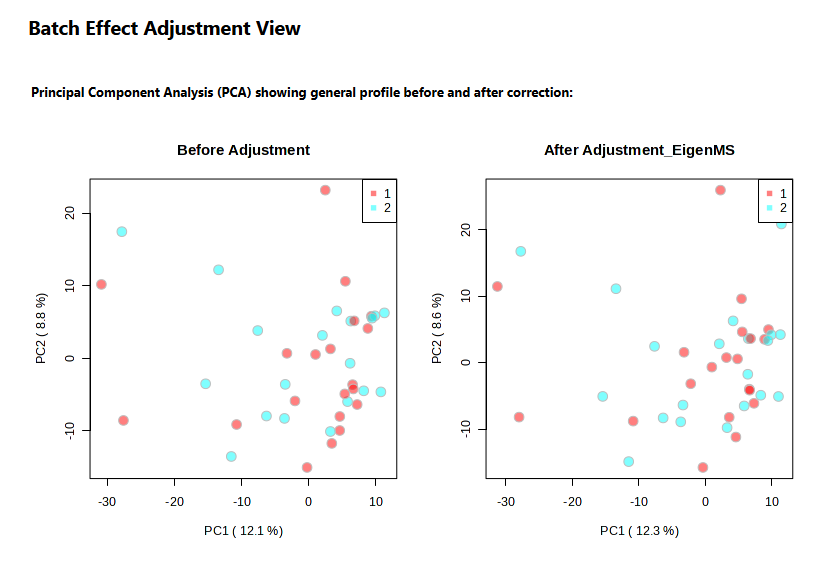

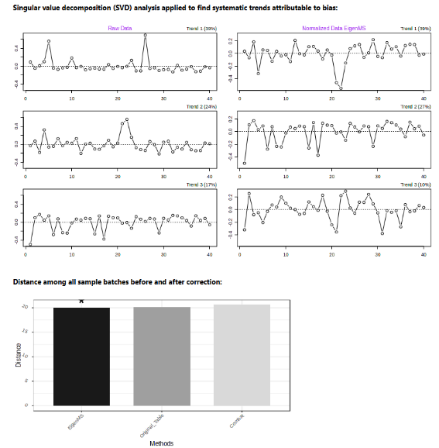


Figure S4: Batch correction plots for the serum metabolite dataset showing variance reduction following EigenMS adjustment.


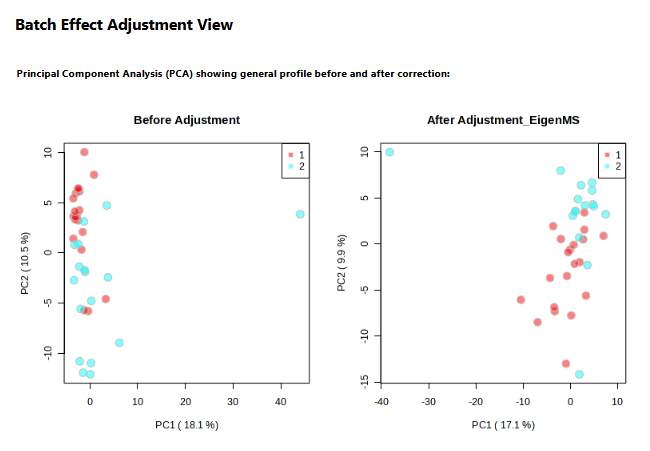

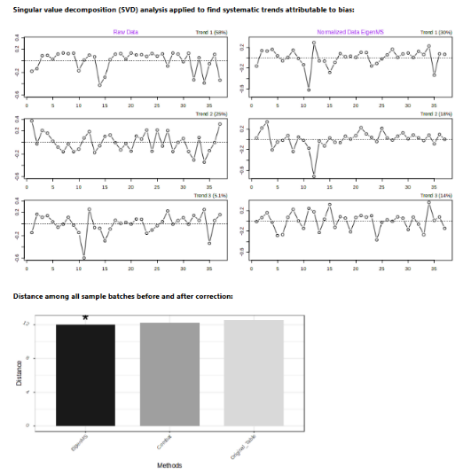


Figure S5: Batch correction plots for the CSF metabolite dataset showing variance reduction following EigenMS adjustment.

Table S1: Results of univariate analysis for serum metabolites showing differential metabolites based on volcano plot analysis.


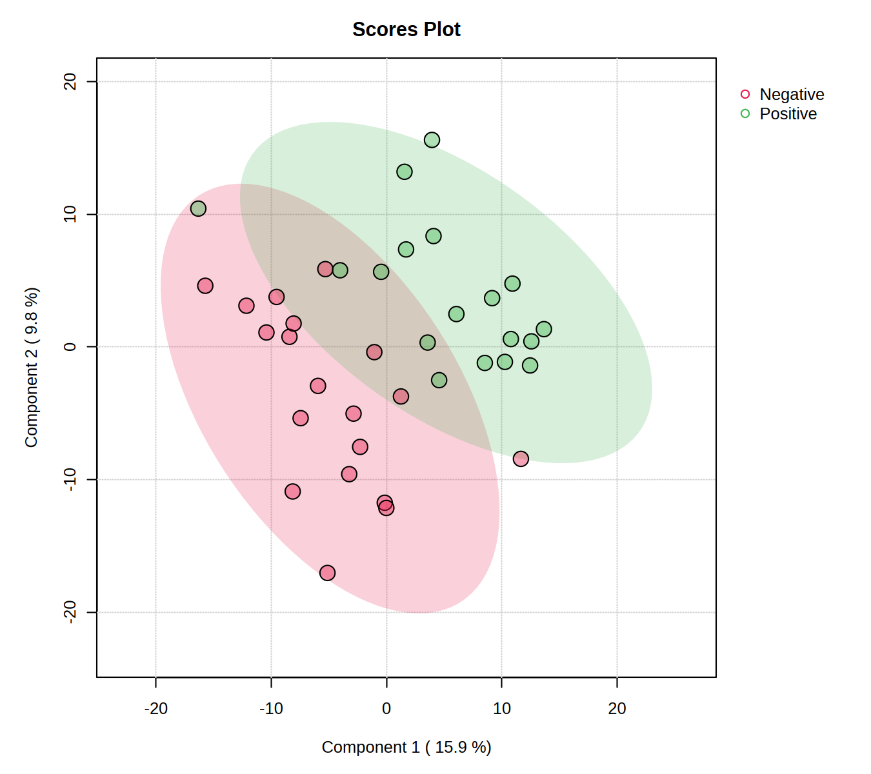

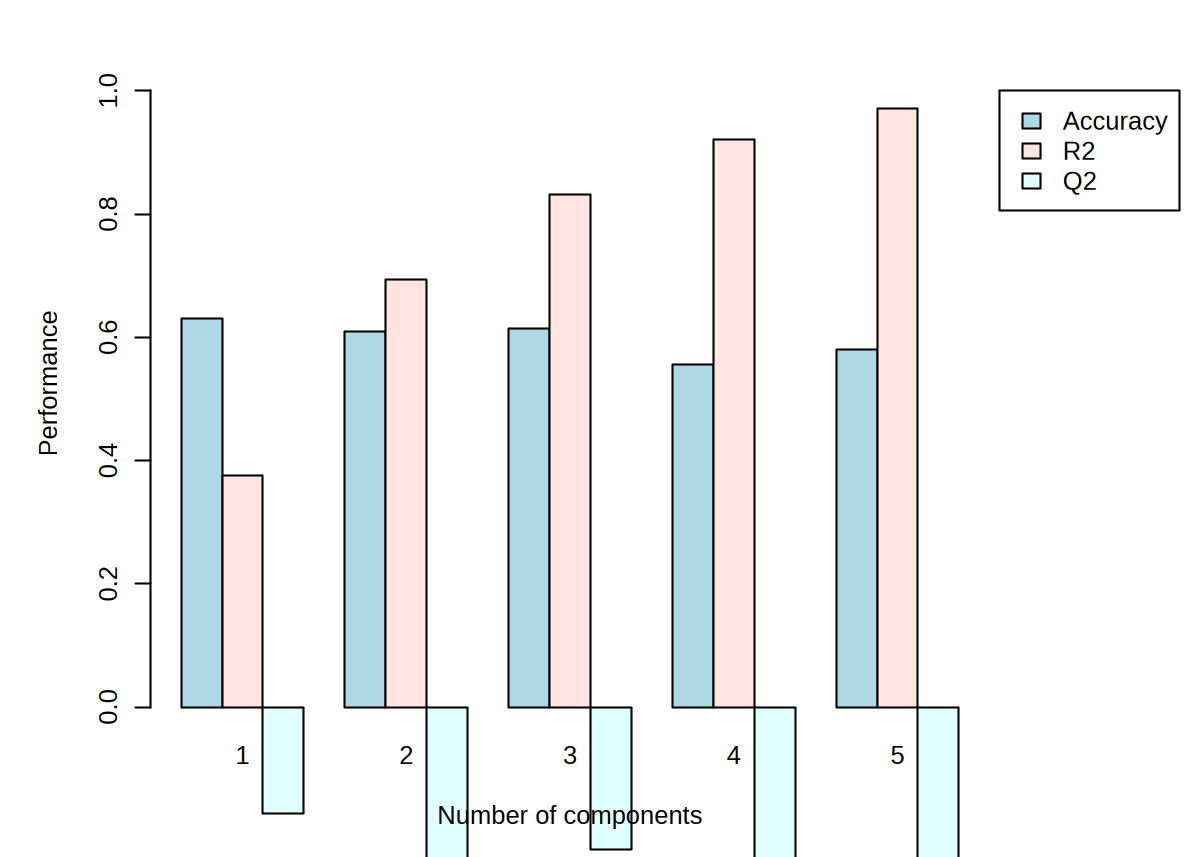

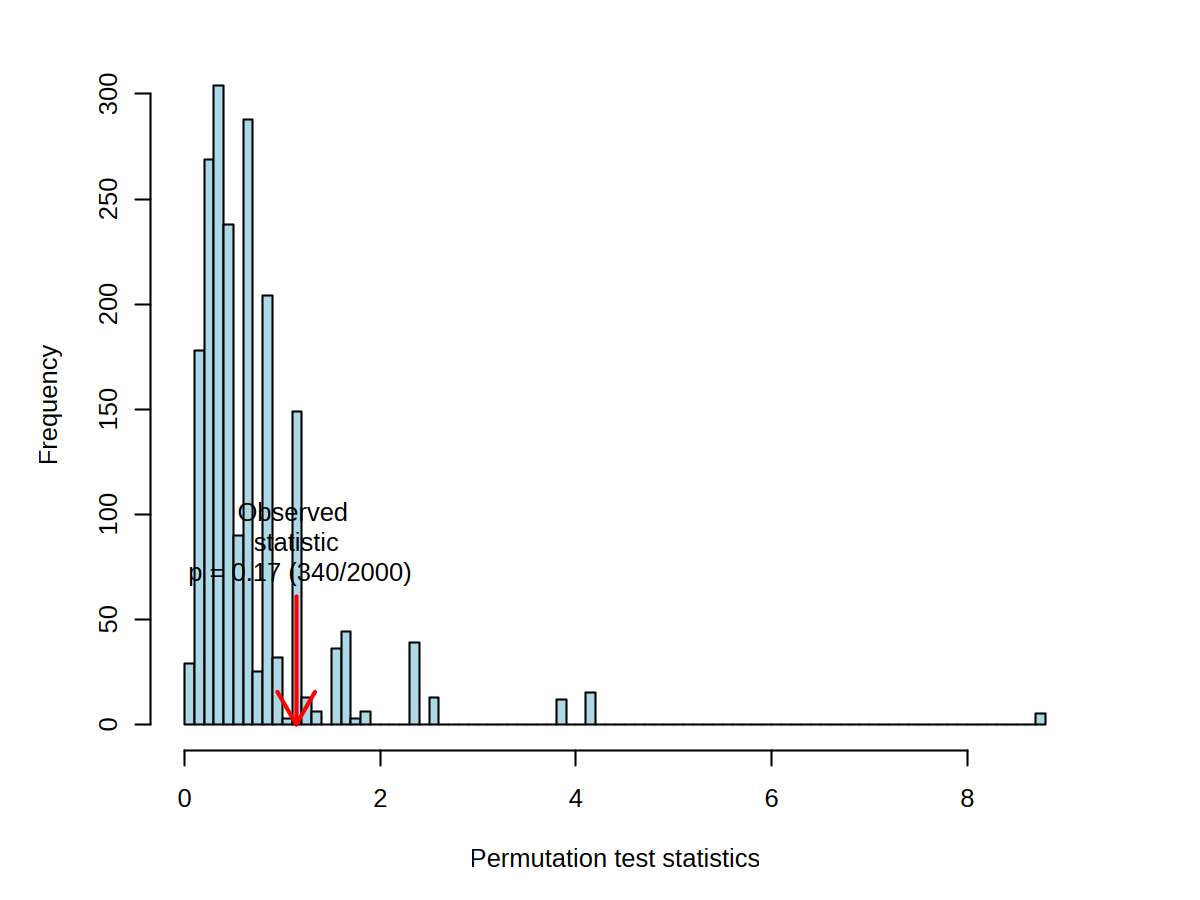


Figure S7: Partial least squares discriminant analysis (PLS-DA) of the CSF metabolite dataset with permutation test validation.


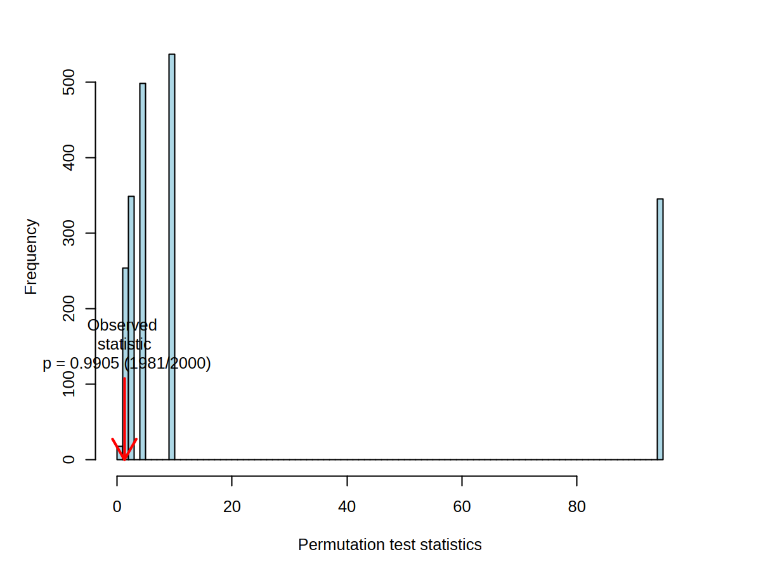

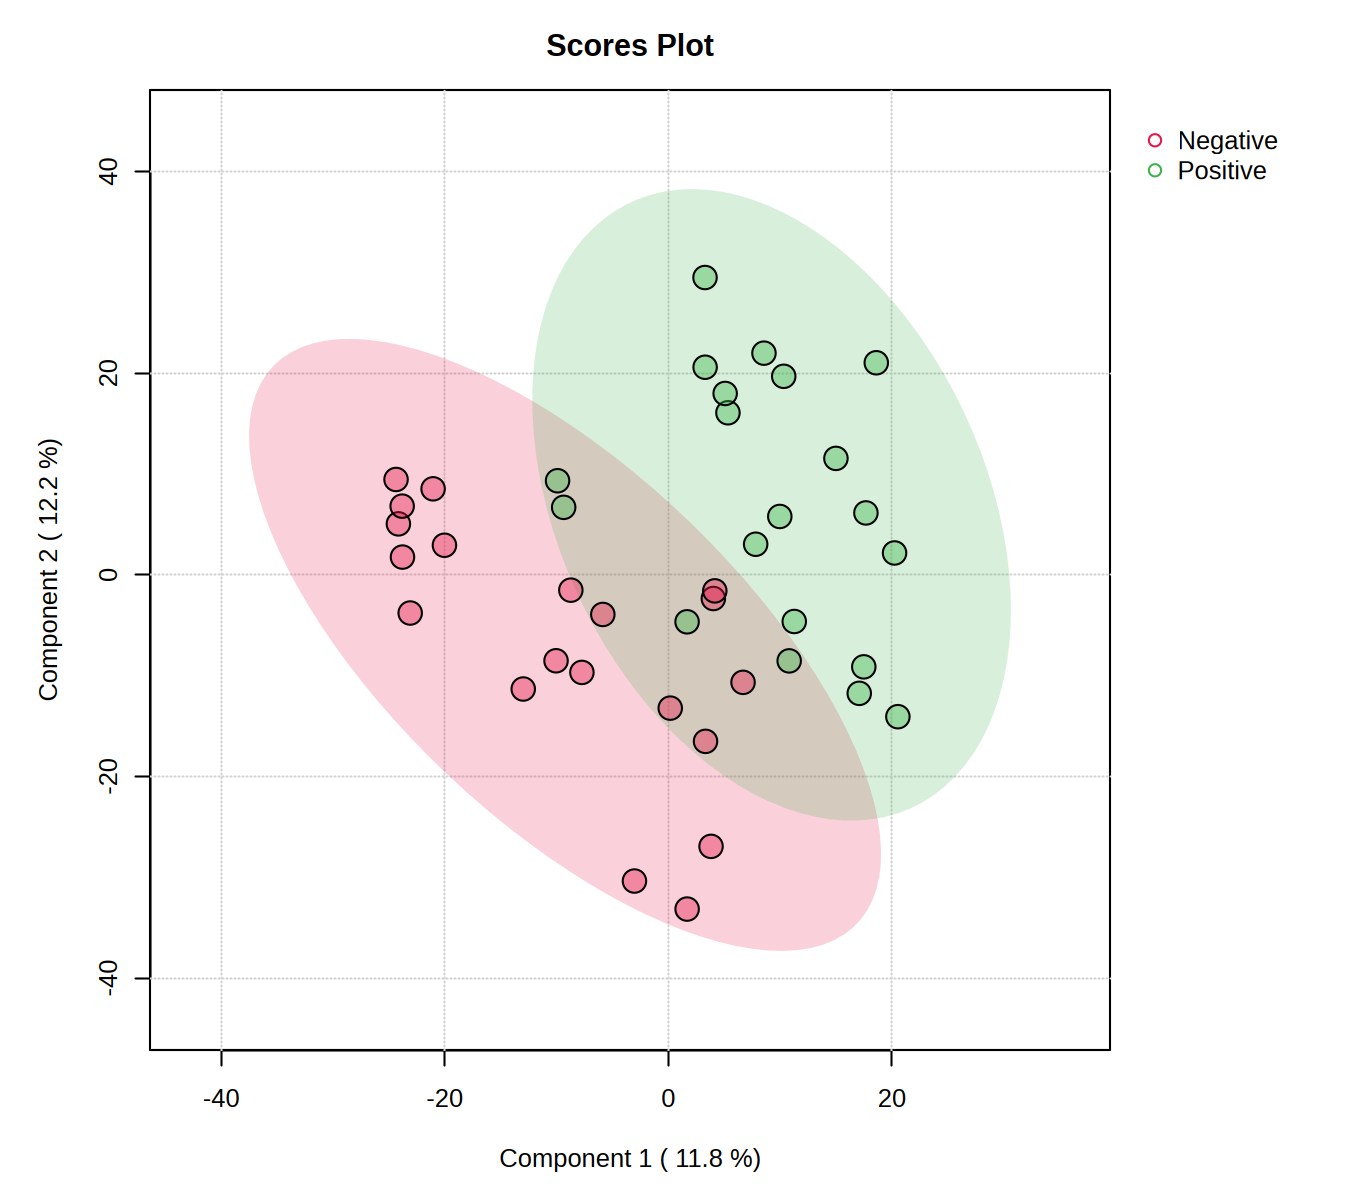

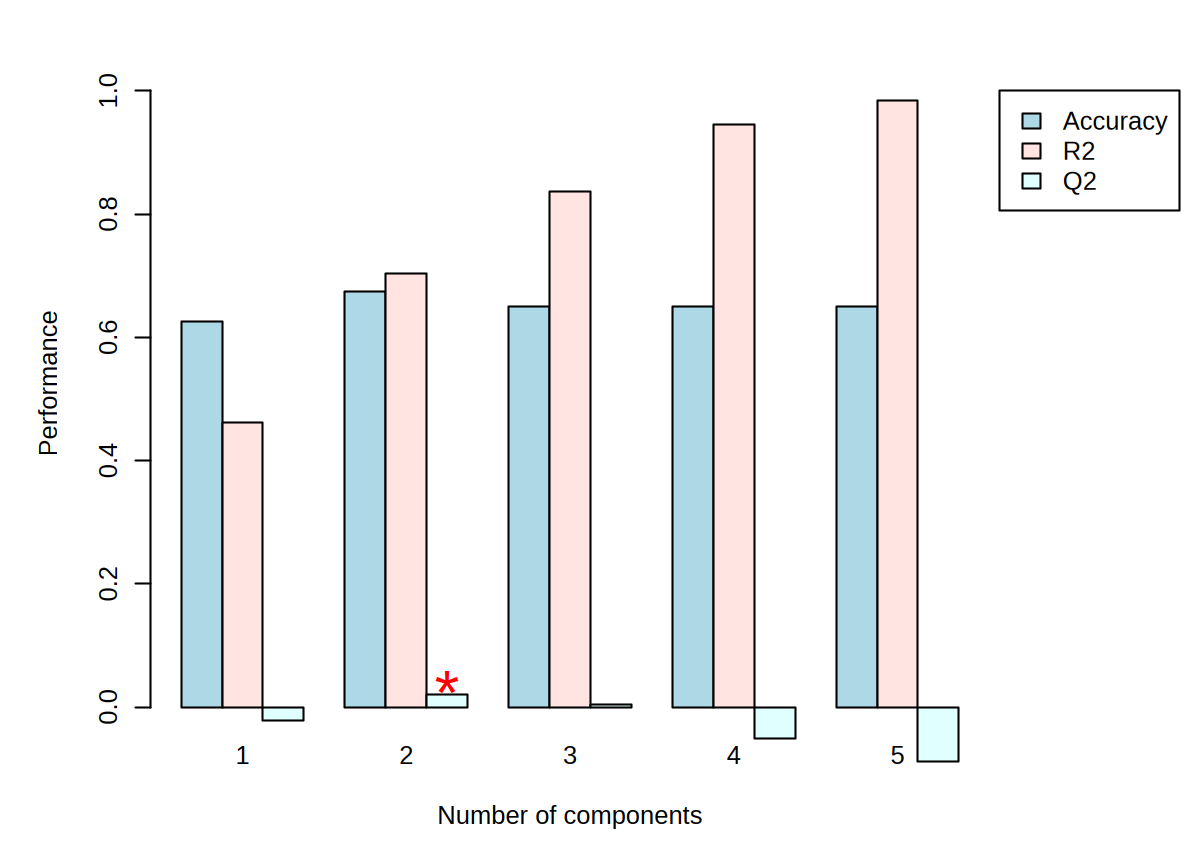


Figure S6: Partial least squares discriminant analysis (PLS-DA) of the serum metabolite dataset with permutation test validation.

| **Peak name** | **FC** | **log2(FC)** | **Raw p value** | **-log10(p)** | **FDR** |
| --- | --- | --- | --- | --- | --- |
| **Analyte 634** | **6.5663** | **2.7151** | **7.9103E-07** | **6.1018** | **0.000343** |
| **Analyte 706** | **6.4349** | **2.6859** | **0.00017243** | **3.7634** | **0.037418** |
| **Glyceric acid** | **2.6403** | **1.4007** | **6.1785E-07** | **6.2091** | **0.000343** |
| **Benzoic Acid** | **0.30796** | **-1.6992** | **0.00010426** | **3.9819** | **0.030167** |
| Mandelic acid | 0.174 | -2.5228 | 0.0024086 | 2.6182 | 0.20906 |
| 4-Cyanophenol | 0.21303 | -2.2309 | 0.0041049 | 2.3867 | 0.2469 |
| 3-Hydroxymandelic acid | 0.34067 | -1.5536 | 0.0079954 | 2.0972 | 0.36413 |
| Uracil | 0.33706 | -1.5689 | 0.011207 | 1.9505 | 0.36413 |
| 4-Hydroxybenzoic acid | 0.24474 | -2.0307 | 0.011858 | 1.926 | 0.36413 |
| 2-Amino-4-methylpyrimidine | 2.6729 | 1.4184 | 0.012166 | 1.9149 | 0.36413 |
| 7-Hydroxyheptanoic acid | 0.411 | -1.2828 | 0.016742 | 1.7762 | 0.4152 |
| 3-Butyl-3-methylcyclohex-1-en-1-ol | 0.25617 | -1.9648 | 0.017298 | 1.762 | 0.4152 |
| Pipecolic acid | 0.13966 | -2.84 | 0.017698 | 1.7521 | 0.4152 |
| 4-Aminobutanoic acid | 0.11242 | -3.153 | 0.019179 | 1.7172 | 0.42281 |
| 3,4-Dimethylbenzoic acid | 0.43836 | -1.1898 | 0.021429 | 1.669 | 0.44246 |
| Pyrrole-2-carboxylic acid | 0.34793 | -1.5231 | 0.022264 | 1.6524 | 0.44246 |
| 2-Methylpropane-1,2-diol | 3.222 | 1.688 | 0.023837 | 1.6227 | 0.44246 |
| Indoleacetic acid | 0.25971 | -1.945 | 0.023877 | 1.622 | 0.44246 |
| L-Asparagine | 2.2462 | 1.1675 | 0.023897 | 1.6217 | 0.44246 |
| Indolelactic acid | 0.4696 | -1.0905 | 0.026876 | 1.5706 | 0.44676 |
| Methylsuccinic acid | 0.42023 | -1.2507 | 0.027454 | 1.5614 | 0.44676 |
| 2-hydroxy-3-(4-hydroxy-3-methoxyphenyl)propanoic acid | 0.24367 | -2.037 | 0.028308 | 1.5481 | 0.44676 |
| 5-Methylpyrimidine-2,4-diol | 0.36208 | -1.4656 | 0.028308 | 1.5481 | 0.44676 |
| Quinaldic acid | 0.18784 | -2.4124 | 0.035874 | 1.4452 | 0.50103 |
| L-Threonine | 3.7202 | 1.8954 | 0.03705 | 1.4312 | 0.50103 |
| D-Xylose* | 0.34366 | -1.541 | 0.037519 | 1.4257 | 0.50103 |
| 3-Hydroxyisovaleric acid | 0.15484 | -2.6912 | 0.046586 | 1.3317 | 0.53591 |
| Benzeneacetic acid | 0.25899 | -1.9491 | 0.049649 | 1.3041 | 0.53591 |

* The identity of sugar-related metabolites is considered tentative, as GC-based analysis can present challenges in resolving and differentiating structurally similar sugars.

***Table S2: Pathway analysis results for serum metabolites. The table summarises significantly enriched metabolic pathways identified from differential metabolites identified via volcano plot analysis.***

| **Pathway name**  **(significant pathways in bold)** | **Hits/Total Compounds** | **Hits  (indicated in blue font)** | **Raw p** | **-log10(p)** | **Holm adjust** | **FDR** | **Impact** |
| --- | --- | --- | --- | --- | --- | --- | --- |
| **Glycerolipid metabolism** | **1/14** | **(Triacylglycerol; Acyl-CoA; 1,2-Diacyl-sn-glycerol; Phosphatidate; 1-Acylglycerol; 1-Acyl-sn-glycerol 3-phosphate; sn-Glycerol 3-phosphate; Glycerone; Glycerol; D-Glyceraldehyde; D-Glycerate; Fatty acid; Glycerone phosphate; 2-Phospho-D-glycerate)** | **3.06E-06** | **5.5142** | **4.59E-05** | **1.53E-05** | **0.09346** |
| **Glyoxylate and dicarboxylate metabolism** | **1/31** | **(Hydroxypyruvate; cis-Aconitate; 4-Hydroxy-2-oxoglutarate; N-Formylderivatives; Oxygen; Glycolate; Acetyl-CoA; Oxaloacetate; (S)-Malate; (S)-Methylmalonyl-CoA; Propanoyl-CoA; (R)-Methylmalonyl-CoA; L-Serine; Glyoxylate; Glycine; Hydrogen peroxide; L-Glutamate; (2S)-Ethylmalonyl-CoA; D-Glycerate; Acetate; 2-Hydroxy-3-oxopropanoate; Isocitrate; Pyruvate; Formate; Citrate; Acetoacetyl-CoA; Succinyl-CoA; Ammonia; L-Glutamine; (2R)-Ethylmalonyl-CoA; 2-Phospho-D-glycerate)** | **3.06E-06** | **5.5142** | **4.59E-05** | **1.53E-05** | **0.06433** |
| **Pentose phosphate pathway** | **1/23** | **(alpha-D-Glucose 6-phosphate; Deoxyribose; 2-Deoxy-D-ribose 1-phosphate; 2-Deoxy-D-ribose 5-phosphate; D-Ribose 5-phosphate; alpha-D-Ribose 1-phosphate; D-Ribose; D-Glyceraldehyde 3-phosphate; Sedoheptulose 7-phosphate; D-Ribulose 5-phosphate; D-Fructose 6-phosphate; D-Fructose 1,6-bisphosphate; 6-Phospho-D-gluconate; D-Glucono-1,5-lactone 6-phosphate; D-Gluconic acid; D-Glucono-1,5-lactone; D-Glycerate; Sedoheptulose; beta-D-Glucose 6-phosphate; 5-Phospho-alpha-D-ribose 1-diphosphate; D-Xylulose 5-phosphate; D-Erythrose 4-phosphate; 2-Phospho-D-glycerate)** | **3.06E-06** | **5.5142** | **4.59E-05** | **1.53E-05** | **0** |
| **Glycine, serine and threonine metabolism** | **2/34** | **(L-Serine; Choline; Betaine aldehyde; Betaine; Guanidinoacetate; 3-Phospho-D-glycerate; N,N-Dimethylglycine; L-Cystathionine; Glycine; O-Phospho-L-serine; Sarcosine; 5,10-Methylenetetrahydrofolate; L-Threonine; Lipoylprotein; Aminoacetone; D-Glycerate; [Protein]-S8-aminomethyldihydrolipoyllysine; Tetrahydrofolate; Dihydrolipoylprotein; 2-Phospho-D-glycerate; D-Serine; Hydroxypyruvate; Creatine; 3-Phosphonooxypyruvate; L-Cysteine; L-Allothreonine; 2-Oxobutanoate; Glyoxylate; L-2-Amino-3-oxobutanoic acid; Pyruvate; CO2; 5-Aminolevulinate; Methylglyoxal; Ammonia)** | **0.000597** | **3.224** | **0.007164** | **0.002239** | **0.05061** |
| Alanine, aspartate and glutamate metabolism | 2/27 | (N-Acetyl-L-aspartate; 2-Oxosuccinamate; L-Aspartate; **L-Asparagine**; N-(L-Arginino)succinate; N6-(1,2-Dicarboxyethyl)-AMP; L-Alanine; Succinate semialdehyde; L-Glutamate; **4-Aminobutanoate**; L-Glutamine; Ammonia; 2-Oxoglutaramate; (S)-1-Pyrroline-5-carboxylate; N-Acetylaspartylglutamate; N-Acetylaspartylglutamylglutamate; Citrate; Oxaloacetate; Fumarate; Pyruvate; N-Carbamoyl-L-aspartate; Succinate; 2-Oxoglutarate; Carbamoyl phosphate; D-Glucosamine 6-phosphate; 5-Phosphoribosylamine; beta-Citryl-L-glutamate) | 0.00371 | 2.4307 | 0.040804 | 0.011128 | 0.09677 |
| Valine, leucine and isoleucine biosynthesis | 1/8 | (**L-Threonine**; (S)-3-Methyl-2-oxopentanoic acid; L-Leucine; 3-Methyl-2-oxobutanoic acid; 2-Oxobutanoate; L-Isoleucine; 4-Methyl-2-oxopentanoate; L-Valine) | 0.004615 | 2.3359 | 0.046146 | 0.011537 | 0 |
| Pyrimidine metabolism | 1/38 | (UDP; L-Glutamine; Carbamoyl phosphate; (S)-Dihydroorotate; Orotidine 5'-phosphate; UMP; UTP; Uridine; 5,6-Dihydrouracil; 3-Ureidopropionate; CTP; CDP; CMP; Cytidine; dCDP; dCMP; dCTP; Deoxycytidine; dUTP; dUDP; dUMP; Deoxyuridine; dTDP; dTTP; dTMP; Thymidine; Thymine; (R)-5,6-Dihydrothymine; (R)-3-Ureidoisobutyrate; P1,P4-Bis(5'-uridyl) tetraphosphate; 2'-Deoxy-5-hydroxymethylcytidine-5'-diphosphate; N-Carbamoyl-L-aspartate; Orotate; 5-Phospho-alpha-D-ribose 1-diphosphate; **Uracil**; beta-Alanine; (R)-3-Amino-2-methylpropanoate; 2'-Deoxy-5-hydroxymethylcytidine-5'-triphosphate) | 0.009479 | 2.0232 | 0.08531 | 0.015798 | 0.0685 |
| beta-Alanine metabolism | 1/21 | (Propanoyl-CoA; 3-Hydroxypropionyl-CoA; 3-Hydroxypropanoate; Malonyl-CoA; 3-Oxopropanoate; beta-Alanine; L-Aspartate; 1,3-Diaminopropane; 3-Aminopropanal; 3-Ureidopropionate; 5,6-Dihydrouracil; Carnosine; beta-Alanyl-N(pi)-methyl-L-histidine; Spermine; Propenoyl-CoA; Acetyl-CoA; beta-Alanyl-L-arginine; **Uracil**; beta-Alanyl-L-lysine; L-Histidine; Spermidin) | 0.009479 | 2.0232 | 0.08531 | 0.015798 | 0 |
| Pantothenate and CoA biosynthesis | 1/20 | (Dephospho-CoA; Pantetheine 4'-phosphate; Pantetheine; (R)-4'-Phosphopantothenoyl-L-cysteine; N-((R)-Pantothenoyl)-L-cysteine; Pantothenate; 3-Ureidopropionate; 5,6-Dihydrouracil; L-Valine; L-Aspartate; CoA; Apo-[acyl-carrier protein]; D-4'-Phosphopantothenate; L-Cysteine; 3-Aminopropanal; beta-Alanine; **Uracil;** 3-Methyl-2-oxobutanoic acid; Acyl-carrier protein; Adenosine 3',5'-bisphosphate) | 0.009479 | 2.0232 | 0.08531 | 0.015798 | 0 |
| Ubiquinone and other terpenoid-quinone biosynthesis | 1/19 | (all-trans-Polyprenyl diphosphate; **4-Hydroxybenzoate**; 3-Demethylubiquinol; 3,4-Dihydroxy-5-polyprenylbenzoate; 3-(4-Hydroxyphenyl)pyruvate; L-Tyrosine; 2-Methoxy-6-all-trans-polyprenyl-1,4-benzoquinol; 5-Methoxy-2-methyl-3-(all-trans-polyprenyl)benzene-1,4-diol; Menaquinone; 2,3-Epoxymenaquinone; Phylloquinol; Phylloquinone; Menaquinol; Vitamin K1 epoxide; 4-Hydroxy-3-polyprenylbenzoate; 3-Methoxy-4-hydroxy-5-polyprenylbenzoate; Ubiquinol; Homogentisate; 2-Polyprenyl-6-methoxyphenol) | 0.032486 | 1.4883 | 0.19492 | 0.04873 | 0 |
| Tryptophan metabolism | 1/39 | (L-Tryptophan; Melatonin; N-Acetylserotonin; Serotonin; 5-Hydroxyindoleacetate; 5-Hydroxykynurenamine; 5-Hydroxykynurenine; 5-Hydroxy-L-tryptophan; L-Formylkynurenine; Acetoacetyl-CoA; (S)-3-Hydroxybutanoyl-CoA; Crotonoyl-CoA; Glutaryl-CoA; 2-Oxoadipate; 2-Aminomuconate semialdehyde; 2-Amino-3-carboxymuconate semialdehyde; 3-Hydroxyanthranilate; L-Kynurenine; Formylanthranilate; 3-Hydroxy-L-kynurenine; 3-Hydroxykynurenamine; Indole-3-acetaldehyde; 5-Hydroxy-N-formylkynurenine; 5-Hydroxyindoleacetaldehyde; Tryptamine; Indolepyruvate; Formyl-N-acetyl-5-methoxykynurenamine; 6-Hydroxymelatonin; Formyl-5-hydroxykynurenamine; 5-Methoxyindoleacetate; 4,6-Dihydroxyquinoline; Acetyl-CoA; 2-Aminomuconate; Anthranilate; Cinnavalininate; 4-(2-Amino-3-hydroxyphenyl)-2,4-dioxobutanoate; 4-(2-Aminophenyl)-2,4-dioxobutanoate; 4,8-Dihydroxyquinoline; **Indole-3-acetate**) | 0.03701 | 1.4317 | 0.19492 | 0.050468 | 0 |
| Arginine and proline metabolism | 1/36 | Guanidinoacetate; Creatine; L-Arginine; L-Ornithine; S-Adenosylmethioninamine; Putrescine; Spermidine; S-Adenosyl-L-methionine; Spermine; 4-Aminobutyraldehyde; **4-Aminobutanoate**; N-Acetylputrescine; N4-Acetylaminobutanal; 4-Guanidinobutanoate; N(omega)-Hydroxyarginine; L-1-Pyrroline-3-hydroxy-5-carboxylate; Hydroxyproline; L-Proline; L-4-Hydroxyglutamate semialdehyde; L-Glutamate 5-semialdehyde; L-Glutamate; L-Glutamyl 5-phosphate; Peptide; L-erythro-4-Hydroxyglutamate; (4R)-4-Hydroxy-2-oxoglutarate; D-Proline; trans-3-Hydroxy-L-proline; Phosphocreatine; Agmatine; Homocarnosine; 4-Acetamidobutanoate; Nitric oxide; (S)-1-Pyrroline-5-carboxylate; Glyoxylate; Pyruvate; 1-Pyrroline-2-carboxylate) | 0.048856 | 1.3111 | 0.19542 | 0.056372 | 0.05645 |
| Butanoate metabolism | 1/15 | ((R)-3-Hydroxybutanoate; Acetoacetate; (S)-3-Hydroxy-3-methylglutaryl-CoA; Acetoacetyl-CoA; Acetyl-CoA; (S)-3-Hydroxybutanoyl-CoA; Crotonoyl-CoA; **4-Aminobutanoate**; L-Glutamate; Butanoyl-CoA; Succinate semialdehyde; Butanoic acid; 2-Oxoglutarate; Succinate; 2-Hydroxyglutarate) | 0.048856 | 1.3111 | 0.19542 | 0.056372 | 0.03175 |
| Lysine degradation | 1/30 | (L-Lysine; N6-(L-1,3-Dicarboxypropyl)-L-lysine; L-2-Aminoadipate 6-semialdehyde; L-2-Aminoadipate; Thiamin diphosphate; 2-Oxoadipate; 4-Carboxy-1-hydroxybutyryl-ThPP; Enzyme N6-(lipoyl)lysine; [Dihydrolipoyllysine-residue succinyltransferase] S-glutaryldihydrolipoyllysine; Enzyme N6-(dihydrolipoyl)lysine; Glutaryl-CoA; Crotonoyl-CoA; (S)-3-Hydroxybutanoyl-CoA; Acetoacetyl-CoA; L-Hydroxylysine; 5-Phosphooxy-L-lysine; **L-Pipecolate**; Protein lysine; Protein N6-methyl-L-lysine; Protein N6,N6-dimethyl-L-lysine; N6,N6,N6-Trimethyl-L-lysine; 4-Trimethylammoniobutanal; 4-Trimethylammoniobutanoate; Procollagen 5-hydroxy-L-lysine; Acetyl-CoA; (S)-2,3,4,5-Tetrahydropyridine-2-carboxylate; Protein N6,N6,N6-trimethyl-L-lysine; (3S)-3-Hydroxy-N6,N6,N6-trimethyl-L-lysine; Carnitine; 5-(D-Galactosyloxy)-L-lysine-procollagen) | 0.065153 | 1.1861 | 0.19542 | 0.069807 | 0 |
| Phenylalanine metabolism | 1/10 | Phenylacetaldehyde; L-Phenylalanine; Phenethylamine; Phenylpyruvate; Phenylacetyl-CoA; **Phenylacetic acid**; 2-Hydroxyphenylacetate; 2-Hydroxy-3-phenylpropenoate; L-Tyrosine; Phenylacetylglycine | 0.19556 | 0.70872 | 0.19556 | 0.19556 | 0 |

***Table S3: Peak descriptors and AUC analysis results for statistically differential serum metabolites.***

| **Peak name** | **Unique Mass** | | **1st and 2nd dimension retention times (s)** | **AUC analysis results** | | | |
| --- | --- | --- | --- | --- | --- | --- | --- |
| **AUC** | **P value** | **FC** | **Custers** |
| Analyte 634 | | 235 | 1487; 2.18 | 0.9575 | 5.61E-08 | 2.7151 | 4 |
| Glyceric acid | | 189 | 1016; 1.64 | 0.9250 | 3.06E-06 | 1.4007 | 1 |
| Analyte 706 | | 146 | 1565; 1.68 | 0.8475 | 2.44E-05 | 2.6859 | 4 |
| Benzoic Acid | | 179 | 848, 2.36 | 0.8425 | 0.000155 | -1.6992 | 5 |


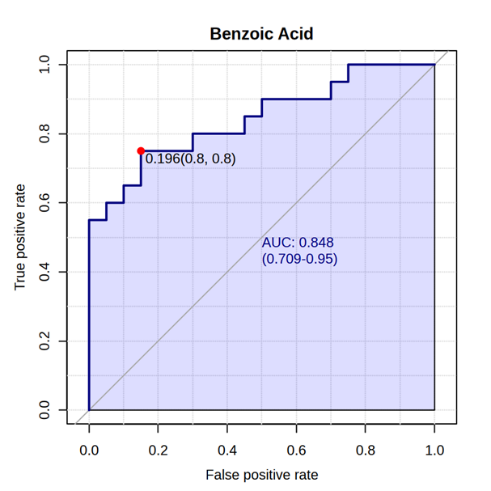

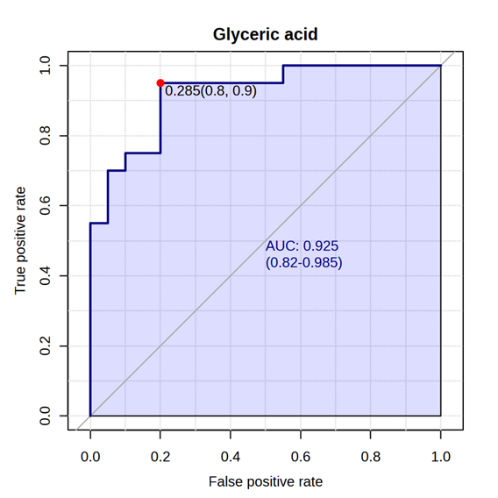


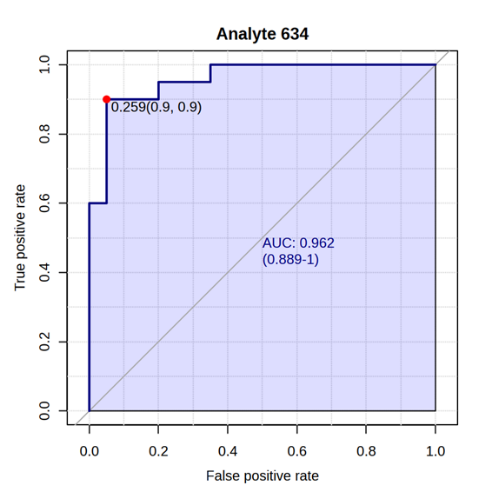

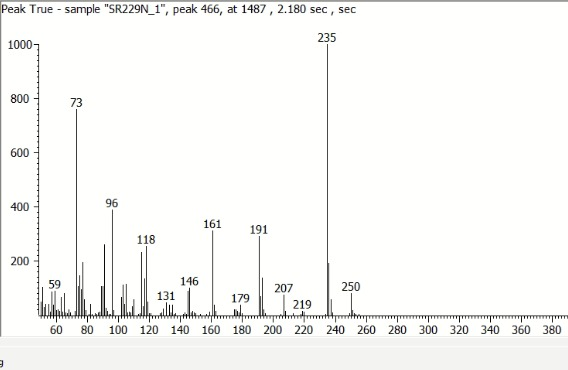


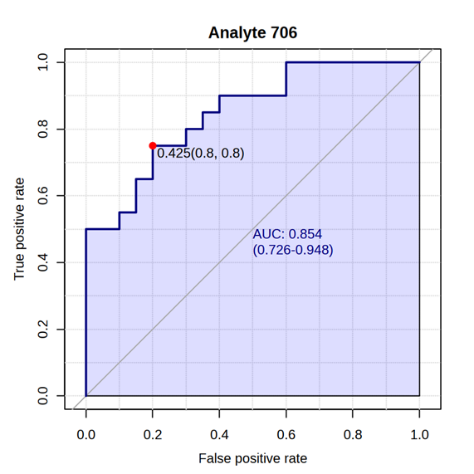

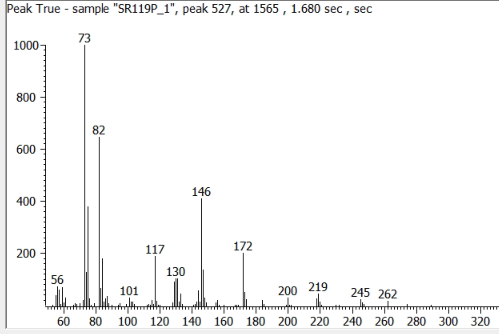


Figure S8: Receiver operating characteristic (ROC) curve analysis for differential metabolites identified in serum and representative mass spectrum for serum unannotated compounds :analyte 634 and analyte 706. The ROC curve displays the diagnostic performance of analyte 706 in distinguishing between the positive and negative groups, with the area under the curve (AUC) indicating overall discriminative ability.

Table S4: Results of univariate analysis for CSF metabolites showing differential metabolites based on volcano plot analysis.

| **Peak name** | **FC** | **log2(FC)** | **Raw p-value** | **-log10(p)** | **FDR** |
| --- | --- | --- | --- | --- | --- |
| **Analyte 369** | **7.1461** | **2.8371** | **0.000011021** | **4.9578** | **0.003306** |
| Sorbose* | 4.3301 | 2.1144 | 0.0020991 | 2.678 | 0.31487 |
| Gluconolactone | 6.197 | 2.6316 | 0.030917 | 1.5098 | 0.61851 |
| Niacin | 0.36791 | -1.4426 | 0.033309 | 1.4774 | 0.61851 |
| Pyroglutamic acid | 2.1642 | 1.1139 | 0.037343 | 1.4278 | 0.61851 |
| Indolelactic acid | 0.13797 | -2.8576 | 0.041825 | 1.3786 | 0.61851 |
| 4-Hydroxymandelic acid | 0.40058 | -1.3198 | 0.042822 | 1.3683 | 0.61851 |
| D-Gluconic acid | 5.6287 | 2.4928 | 0.04418 | 1.3548 | 0.61851 |
| 2-Methylglycerol | 0.29481 | -1.7621 | 0.047031 | 1.3276 | 0.61851 |
| Methylmalonic acid | 0.17209 | -2.5388 | 0.04777 | 1.3208 | 0.61851 |

* The identity of sugar-related metabolites is considered tentative, as GC-based analysis can present challenges in resolving and differentiating structurally similar sugars.

***Table S5: Pathway analysis results for CSF metabolites. The table summarises significantly enriched metabolic pathways identified from differential metabolites identified via volcano plot analysis.***

| **Pathway name**  **(significant pathways in bold)** | **Hits/**  **Total Compounds** | **Hits  (indicated in blue font)** | **Raw p** | **-log10(p)** | **Holm adjust** | **FDR** | **Impact** |
| --- | --- | --- | --- | --- | --- | --- | --- |
| Pentose phosphate pathway | 2/23 | alpha-D-Glucose 6-phosphate; Deoxyribose; 2-Deoxy-D-ribose 1-phosphate; 2-Deoxy-D-ribose 5-phosphate; D-Ribose 5-phosphate; alpha-D-Ribose 1-phosphate; D-Ribose; D-Glyceraldehyde 3-phosphate; Sedoheptulose 7-phosphate; D-Ribulose 5-phosphate; D-Fructose 6-phosphate; D-Fructose 1,6-bisphosphate; 6-Phospho-D-gluconate; D-Glucono-1,5-lactone 6-phosphate; **D-Gluconic acid; D-Glucono-1,5-lactone**; D-Glycerate; Sedoheptulose; beta-D-Glucose 6-phosphate; 5-Phospho-alpha-D-ribose 1-diphosphate; D-Xylulose 5-phosphate; D-Erythrose 4-phosphate; 2-Phospho-D-glycerate | 0.021355 | 1.6705 | 0.2349 | 0.11263 | 0.04185 |
| Glutathione metabolism | 1/28 | R-S-Cysteinylglycine; R-S-Glutathione; Glutathione; NADP+; NADPH; Glutathione disulfide; Glycine; gamma-L-Glutamyl-L-cysteine; L-Cysteine; L-Glutamate; Cys-Gly; **5-Oxoproline**; L-Amino acid; (5-L-Glutamyl)-L-amino acid; Acetyl-CoA; S-Substituted L-cysteine; RX; L-Ornithine; Putrescine; Spermidine; Cadaverine; Tryparedoxin; Trypanothione; S-Substituted N-acetyl-L-cysteine; Spermine; Aminopropylcadaverine; Tryparedoxin disulfide; Trypanothione disulfide | 0.049601 | 1.3045 | 0.49601 | 0.11263 | 0.00709 |
| Nicotinate and nicotinamide metabolism | 1/15 | L-Aspartate; Deamino-NAD+; Quinolinate; Nicotinate D-ribonucleoside; Nicotinate D-ribonucleotide; NAD+; Nicotinamide D-ribonucleotide; Nicotinamide-beta-riboside; **Nicotinamide**; 1-Methylnicotinamide; NADP+; Iminoaspartate; Nicotinate; N1-Methyl-4-pyridone-5-carboxamide; N1-Methyl-2-pyridone-5-carboxamide | 0.069942 | 1.1553 | 0.62948 | 0.11263 | 0.1943 |
| Fatty acid biosynthesis | 1/44 | Tetradecanoyl-[acp]; Hexadecanoyl-[acp]; Malonyl-[acyl-carrier protein]; Dodecanoyl-[acyl-carrier protein]; Decanoyl-[acp]; Octanoyl-[acp]; Hexanoyl-[acp]; Butyryl-[acp]; trans-Hexadec-2-enoyl-[acp]; (3R)-3-Hydroxypalmitoyl-[acyl-carrier protein]; 3-Oxohexadecanoyl-[acp]; trans-Tetradec-2-enoyl-[acp]; (3R)-3-Hydroxytetradecanoyl-[acyl-carrier protein]; 3-Oxotetradecanoyl-[acp]; trans-Dodec-2-enoyl-[acp]; (3R)-3-Hydroxydodecanoyl-[acyl-carrier protein]; 3-Oxododecanoyl-[acp]; trans-Dec-2-enoyl-[acp]; (3R)-3-Hydroxydecanoyl-[acyl-carrier protein]; 3-Oxodecanoyl-[acp]; trans-Oct-2-enoyl-[acp]; (3R)-3-Hydroxyoctanoyl-[acyl-carrier protein]; 3-Oxooctanoyl-[acp]; trans-Hex-2-enoyl-[acp]; (3R)-3-Hydroxyhexanoyl-[acyl-carrier protein]; 3-Oxohexanoyl-[acp]; But-2-enoyl-[acyl-carrier protein]; (3R)-3-Hydroxybutanoyl-[acyl-carrier protein]; Acetyl-[acyl-carrier protein]; Acyl-carrier protein; Malonyl-CoA; Acetyl-CoA; Hexadecanoic acid; **Malonate**; Acyl-[acyl-carrier protein]; Long-chain fatty acid; (3R)-3-Hydroxyacyl-[acyl-carrier protein]; trans-2,3-Dehydroacyl-[acyl-carrier protein]; 3-Oxoacyl-[acyl-carrier protein]; Tetradecanoic acid; 3-Oxostearoyl-[acp]; Acetoacetyl-[acp]; Palmitoyl-CoA; Long-chain acyl-CoA | 0.088041 | 1.0553 | 0.70433 | 0.11263 | 0 |
| Phenylalanine, tyrosine and tryptophan biosynthesis | ¼ | Phenylpyruvate; L-Phenylalanine; **L-Tyrosine**; 3-(4-Hydroxyphenyl)pyruvate | 0.090026 | 1.0456 | 0.70433 | 0.11263 | 0.5 |
| Tyrosine metabolism | 1/42 | L-Dopachrome; L-Normetanephrine; 3-Methoxy-4-hydroxyphenylglycolaldehyde; L-Noradrenaline; L-Adrenaline; 3,4-Dihydroxymandelate; 3,4-Dihydroxymandelaldehyde; 3,4-Dihydroxyphenylethyleneglycol; L-Metanephrine; Dopamine; 3,4-Dihydroxyphenylacetaldehyde; 3,4-Dihydroxyphenylacetate; 3-Methoxy-4-hydroxyphenylacetaldehyde; 3-Methoxytyramine; 3,4-Dihydroxy-L-phenylalanine; 3,5-Diiodo-L-tyrosine; 3-Iodo-L-tyrosine; **L-Tyrosine**; 3-Fumarylpyruvate; 4-Fumarylacetoacetate; 4-Maleylacetoacetate; Homogentisate; 3-(4-Hydroxyphenyl)pyruvate; 4-Hydroxyphenylacetaldehyde; Tyramine; 5,6-Dihydroxyindole; Gentisate aldehyde; 5,6-Dihydroxyindole-2-carboxylate; 3-Methoxy-4-hydroxymandelate; 3-Methoxy-4-hydroxyphenylethyleneglycol; Homovanillate; Triiodothyronine; Pyruvate; Fumarate; Acetoacetate; 2-Hydroxy-3-(4-hydroxyphenyl)propenoate; 4-Hydroxyphenylacetate; Indole-5,6-quinone; Dopaquinone; Thyroxine; 2,5-Dihydroxybenzoate; 5,6-Indolequinone-2-carboxylic acid | 0.090026 | 1.0456 | 0.70433 | 0.11263 | 0.13972 |
| Ubiquinone and other terpenoid-quinone biosynthesis | 1/19 | all-trans-Polyprenyl diphosphate; 4-Hydroxybenzoate; 3-Demethylubiquinol; 3,4-Dihydroxy-5-polyprenylbenzoate; 3-(4-Hydroxyphenyl)pyruvate**; L-Tyrosine**; 2-Methoxy-6-all-trans-polyprenyl-1,4-benzoquinol; 5-Methoxy-2-methyl-3-(all-trans-polyprenyl)benzene-1,4-diol; Menaquinone; 2,3-Epoxymenaquinone; Phylloquinol; Phylloquinone; Menaquinol; Vitamin K1 epoxide; 4-Hydroxy-3-polyprenylbenzoate; 3-Methoxy-4-hydroxy-5-polyprenylbenzoate; Ubiquinol; Homogentisate; 2-Polyprenyl-6-methoxyphenol | 0.090026 | 1.0456 | 0.70433 | 0.11263 | 0 |
| Phenylalanine metabolism | 1/10 | Phenylacetaldehyde; L-Phenylalanine; Phenethylamine; Phenylpyruvate; Phenylacetyl-CoA; Phenylacetic acid; 2-Hydroxyphenylacetate; 2-Hydroxy-3-phenylpropenoate; **L-Tyrosine**; Phenylacetylglycine | 0.090026 | 1.0456 | 0.70433 | 0.11263 | 0 |
| Valine, leucine and isoleucine degradation | 1/40 | Enzyme N6-(lipoyl)lysine; 2-Methyl-1-hydroxybutyl-ThPP; Enzyme N6-(dihydrolipoyl)lysine; 2-Methyl-1-hydroxypropyl-ThPP; 3-Methyl-1-hydroxybutyl-ThPP; Acetyl-CoA; Acetoacetyl-CoA; Acetoacetate; (S)-3-Hydroxy-3-methylglutaryl-CoA; 3-Methylcrotonyl-CoA; 3-Methylbutanoyl-CoA; (S)-3-Methyl-2-oxopentanoic acid; Thiamin diphosphate; L-Valine; 2-Methylacetoacetyl-CoA; 2-Methylbut-2-enoyl-CoA; 2-Methylpropanoyl-CoA; [Dihydrolipoyllysine-residue (2-methylpropanoyl)transferase] S-(2-methylbutanoyl)dihydrolipoyllysine; 3-Methyl-2-oxobutanoic acid; L-Isoleucine; (R)-Methylmalonyl-CoA; (S)-Methylmalonyl-CoA; Propanoyl-CoA; (S)-Methylmalonate semialdehyde; 2-Methyl-3-oxopropanoate; L-3-Aminoisobutanoate; (2S,3S)-3-Hydroxy-2-methylbutanoyl-CoA; (S)-3-Hydroxyisobutyrate; (S)-3-Hydroxyisobutyryl-CoA; 2-Methylprop-2-enoyl-CoA; (S)-2-Methylbutanoyl-CoA; [Dihydrolipoyllysine-residue (2-methylpropanoyl)transferase] S-(2-methylpropanoyl)dihydrolipoyllysine; 4-Methyl-2-oxopentanoate; [Dihydrolipoyllysine-residue (2-methylpropanoyl)transferase] S-(3-methylbutanoyl)dihydrolipoyllysine; L-Leucine; **Methylmalonate**; (R)-3-Amino-2-methylpropanoate; 3-Methylglutaconyl-CoA; 3-Hydroxyisovaleryl-CoA; Succinyl-CoA | 0.095476 | 1.0201 | 0.70433 | 0.11263 | 0.02264 |
| Tryptophan metabolism | 1/39 | L-Tryptophan; Melatonin; N-Acetylserotonin; Serotonin; 5-Hydroxyindoleacetate; 5-Hydroxykynurenamine; 5-Hydroxykynurenine; 5-Hydroxy-L-tryptophan; L-Formylkynurenine; Acetoacetyl-CoA; (S)-3-Hydroxybutanoyl-CoA; Crotonoyl-CoA; Glutaryl-CoA; 2-Oxoadipate; 2-Aminomuconate semialdehyde; 2-Amino-3-carboxymuconate semialdehyde; 3-Hydroxyanthranilate; L-Kynurenine; Formylanthranilate; 3-Hydroxy-L-kynurenine; 3-Hydroxykynurenamine; Indole-3-acetaldehyde; 5-Hydroxy-N-formylkynurenine; 5-Hydroxyindoleacetaldehyde; Tryptamine; Indolepyruvate; Formyl-N-acetyl-5-methoxykynurenamine; 6-Hydroxymelatonin; Formyl-5-hydroxykynurenamine; 5-Methoxyindoleacetate; 4,6-Dihydroxyquinoline; Acetyl-CoA; 2-Aminomuconate; Anthranilate; Cinnavalininate; 4-(2-Amino-3-hydroxyphenyl)-2,4-dioxobutanoate; 4-(2-Aminophenyl)-2,4-dioxobutanoate; 4,8-Dihydroxyquinoline; **Indole-3-acetate** | 0.11134 | 0.95335 | 0.70433 | 0.11263 | 0 |
| Lysine degradation | 1/30 | L-Lysine; N6-(L-1,3-Dicarboxypropyl)-L-lysine; L-2-Aminoadipate 6-semialdehyde; L-2-Aminoadipate; Thiamin diphosphate; 2-Oxoadipate; 4-Carboxy-1-hydroxybutyryl-ThPP; Enzyme N6-(lipoyl)lysine; [Dihydrolipoyllysine-residue succinyltransferase] S-glutaryldihydrolipoyllysine; Enzyme N6-(dihydrolipoyl)lysine; Glutaryl-CoA; Crotonoyl-CoA; (S)-3-Hydroxybutanoyl-CoA; Acetoacetyl-CoA; L-**Hydroxylysine**; 5-Phosphooxy-L-lysine; **L-Pipecolate**; Protein lysine; Protein N6-methyl-L-lysine; Protein N6,N6-dimethyl-L-lysine; N6,N6,N6-Trimethyl-L-lysine; 4-Trimethylammoniobutanal; 4-Trimethylammoniobutanoate; Procollagen 5-hydroxy-L-lysine; Acetyl-CoA; (S)-2,3,4,5-Tetrahydropyridine-2-carboxylate; Protein N6,N6,N6-trimethyl-L-lysine; (3S)-3-Hydroxy-N6,N6,N6-trimethyl-L-lysine; Carnitine; 5-(D-Galactosyloxy)-L-lysine-procollagen | 0.11263 | 0.94835 | 0.70433 | 0.11263 | 0 |

***Table S6: Peak descriptors and AUC analysis results for statistically differential CSF metabolites.***

| **Peak name** | **Unique Mass** | | **1st and 2nd dimension retention times (s)** | | **AUC analysis results** | | | |
| --- | --- | --- | --- | --- | --- | --- | --- | --- |
| **AUC** | **P value** | **FC** | **Custers** |
| Analyte 369 | | 235 | | 1487; 2.18 | 0.923977 | 5.85E-07 | 2.8371 | 1 |


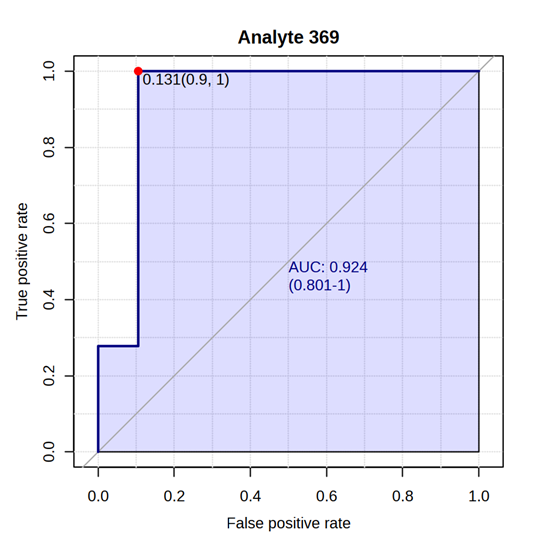
.
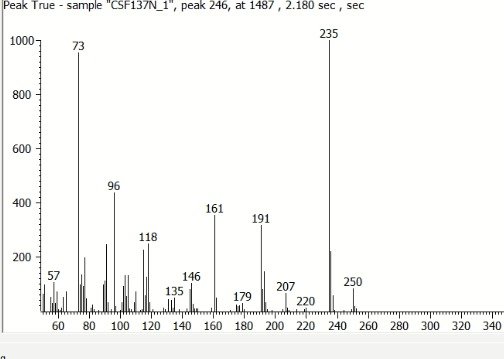


***Figure S9: Receiver operating characteristic (ROC) curve analysis and representative mass spectrum for CSF Analyte 369.***

**APPENDIX II**

**INFORMED CONSENT FORM**For Collection of Blood, CSF, and Brain Tissue from Trade Dogs for Detection of Rabies Virus in Nigerian Dog Markets

**Purpose of the Study:**We are carrying out a study to test for rabies virus in trade dogs sold in Nigerian dog markets. This research will help improve public health safety and protect people and animals from rabies.

**What We Will Do:**

1. Before Slaughter:

- We will collect a small amount of blood (about 4 mL).
- We will collect a small sample of cerebrospinal fluid (CSF).

1. After Slaughter:

- We will collect a small portion of the brain for rabies testing.

**Risks:**

- The dog may feel slight pain or stress during blood and CSF collection.
- All procedures will be carried out carefully using clean and safe veterinary methods.

**Benefits:**

- There may be no direct benefit to you.
- The results will help protect public health and improve rabies control in Nigeria.

**Confidentiality:**

- Your name and information will be kept private.
- Your identity will not appear in any report or publication.

**Voluntary Participation:**

- Participation is voluntary.
- You may refuse without any penalty.
- Your decision will not affect your right to sell dogs in the market.

**Consent Statement:**I have read (or it has been explained to me), and I understand the purpose of this study. I voluntarily agree to allow my dogs to participate, including blood and CSF collection before slaughter and brain tissue collection after slaughter.

**Name of Owner/Trader: ____________________________
Signature/Thumbprint: ____________________________
Date: ____________________________**

**Researcher’s Name: ____________________________
Signature: ____________________________
Date: ____________________________**
